# Supplementary material for: Behavioral alterations are associated with vitamin B12 deficiency in the transcobalamin receptor/CD320 KO mouse
Source: PLoS One. 2017 May 18;12(5):e0177156. doi: 10.1371/journal.pone.0177156 (PMC5436650; doi:10.1371/journal.pone.0177156)
Supplement: S8 Dataset — (XLSX) [file pone.0177156.s008.xlsx]

## Sheet: Figure 8
Group	Brain Weight (mg)		Group	Pyramidal size
WT	498		WT	53.6592
WT	510		WT	50.166
WT	484		WT	54.7238
WT	488		WT	109.857
WT	490		WT	55.7269
WT	493		WT	42.5615
WT	470		WT	62.1254
WT	454		WT	58.0477
WT	455		WT	61.5317
WT	505		WT	69.0021
WT	460		WT	41.7166
WT	479.2		WT	47.0393
WT	506		WT	55.9149
WT	468		WT	52.4197
KO	462		WT	45.3457
KO	448		WT	34.5774
KO	414		WT	56.5104
KO	470		WT	55.9782
KO	419		WT	47.0244
KO	466		WT	49.9966
KO	467		WT	53.7616
KO	465		WT	57.9212
KO	446		WT	53.421
KO	425		WT	53.6592
KO	436		WT	50.166
KO	435		WT	54.7238
KO	422		WT	109.857
KO	430		WT	55.7269
KO	438		WT	42.5615
KO	453		WT	62.1254
KO	472		WT	58.0477
KO	398		WT	61.5317
			WT	69.0021
			WT	66.7577
			WT	65.3693
			WT	69.7056
			WT	80.446
			WT	72.6443
			WT	66.1305
			WT	66.8284
			WT	59.9442
			WT	66.6981
			WT	70.3272
			WT	101.711
			WT	91.6648
			WT	60.2103
			WT	69.2329
			WT	56.4509
			WT	57.9267
			WT	60.8766
			WT	64.9152
			WT	65.5442
			WT	58.7177
			WT	71.3025
			WT	69.2925
			WT	39.9225
			WT	53.9086
			WT	104.914
			WT	46.7657
			WT	55.2672
			WT	53.5829
			WT	59.8102
			WT	76.8839
			WT	59.4919
			WT	46.7452
			WT	66.6274
			WT	66.8005
			WT	82.2401
			WT	74.3435
			WT	80.943
			WT	80.3269
			WT	74.2784
			WT	88.0598
			WT	59.6278
			WT	66.7558
			WT	76.3218
			WT	69.8452
			WT	72.5941
			WT	80.8183
			WT	60.2233
			WT	49.2298
			WT	72.1325
			WT	72.1325
			WT	71.2075
			WT	65.306
			WT	73.0873
			WT	85.7893
			WT	75.5811
			WT	79.5992
			WT	82.5658
			WT	81.9275
			WT	64.2861
			WT	80.6359
			WT	85.6553
			WT	79.3573
			WT	68.3843
			WT	77.1593
			WT	86.8185
			WT	76.2623
			WT	77.982
			WT	71.3304
			WT	90.9836
			WT	87.012
			WT	68.7937
			WT	67.8278
			WT	78.2555
			WT	83.3624
			WT	77.1947
			WT	67.0927
			WT	93.6357
			WT	92.0891
			WT	70.1542
			WT	64.0665
			WT	80.1911
			WT	82.5379
			WT	83.0311
			WT	68.4531
			WT	72.8714
			WT	70.6027
			WT	83.8426
			WT	81.0286
			WT	78.2723
			WT	77.4441
			WT	61.662
			WT	76.6382
			WT	74.6971
			WT	97.0433
			WT	89.8893
			WT	84.7657
			WT	86.8278
			WT	72.1623
			WT	80.3325
			WT	79.3182
			WT	77.0998
			WT	67.7422
			WT	66.9252
			WT	76.9118
			WT	68.7695
			WT	79.5769
			WT	79.5099
			WT	70.0499
			WT	67.0331
			WT	65.7359
			WT	83.1204
			WT	80.6545
			WT	80.5224
			WT	79.4764
			WT	98.5918
			WT	62.7526
			WT	63.3798
			WT	90.321
			WT	82.6105
			WT	75.8324
			WT	72.4135
			WT	70.625
			WT	91.5382
			WT	67.1652
			WT	64.8016
			WT	76.0464
			WT	76.0464
			WT	83.9952
			WT	82.7929
			WT	75.8287
			WT	62.7209
			WT	82.443
			WT	86.342
			WT	75.3857
			WT	94.1679
			WT	83.4592
			WT	73.6903
			WT	69.5177
			WT	72.1753
			WT	68.6876
			WT	68.4736
			WT	88.8359
			WT	87.3824
			WT	64.4871
			WT	72.3856
			WT	98.1767
			WT	98.3126
			WT	91.9309
			WT	85.6962
			WT	87.427
			WT	89.4296
			WT	73.2994
			WT	72.1865
			WT	65.0752
			WT	66.2496
			WT	68.7267
			WT	83.837
			WT	85.3091
			WT	88.231
			WT	78.1662
			WT	78.0862
			WT	77.8535
			WT	82.3165
			WT	79.6718
			WT	76.4931
			WT	66.8712
			WT	84.7284
			WT	72.7113
			WT	66.0188
			WT	79.8096
			WT	78.0341
			WT	65.6764
			WT	65.7936
			WT	49.7342
			WT	64.3568
			WT	58.2487
			WT	56.5514
			WT	66.4897
			WT	63.7203
			WT	65.319
			WT	63.3258
			WT	59.8251
			WT	47.6293
			WT	66.9289
			WT	64.3178
			WT	53.8844
			WT	53.341
			WT	50.7969
			WT	61.8704
			WT	53.5327
			WT	59.5738
			WT	57.5285
			WT	63.0373
			WT	50.3521
			WT	60.8356
			WT	53.3187
			WT	67.3551
			WT	63.51
			WT	58.8201
			WT	56.0712
			WT	70.9116
			WT	56.6389
			WT	57.4652
			WT	64.9226
			WT	62.3059
			WT	62.9312
			WT	62.3617
			WT	57.3721
			WT	65.8234
			WT	60.8933
			WT	60.5918
			WT	62.6074
			WT	58.4627
			WT	58.6861
			WT	57.562
			WT	60.4709
			WT	58.3455
			WT	63.0876
			WT	56.5644
			WT	54.9881
			WT	58.5093
			WT	55.5855
			WT	56.4025
			WT	63.6198
			WT	59.0806
			WT	61.3735
			WT	71.6635
			WT	66.5995
			WT	61.809
			WT	60.4541
			WT	68.4513
			WT	62.5385
			WT	53.0283
			WT	56.3746
			WT	52.8459
			WT	53.957
			WT	57.2232
			WT	69.0803
			WT	63.5398
			WT	60.5434
			WT	49.4383
			WT	54.9881
			WT	50.3334
			WT	53.7411
			WT	49.0549
			WT	57.6625
			WT	62.3506
			WT	50.2944
			WT	39.7847
			WT	58.7084
			WT	59.9684
			WT	52.6933
			WT	49.764
			WT	57.6941
			WT	59.4677
			WT	65.7955
			WT	62.0174
			WT	50.1901
			WT	54.8317
			WT	56.3876
			WT	58.714
			WT	49.9761
			WT	59.8623
			WT	54.0445
			WT	67.3848
			WT	63.2513
			WT	74.2207
			WT	66.1119
			WT	61.0794
			WT	53.4322
			WT	51.7739
			WT	60.6644
			WT	65.2632
			WT	62.4957
			WT	60.9231
			WT	61.9765
			WT	72.2963
			WT	57.6234
			WT	44.4933
			WT	61.4144
			WT	55.7976
			WT	59.5515
			WT	57.4652
			WT	62.6279
			WT	51.9768
			WT	53.4601
			WT	66.0467
			WT	57.9788
			WT	52.2504
			WT	53.2926
			WT	65.3209
			WT	60.9659
			WT	60.9622
			WT	50.6443
			WT	48.0517
			WT	55.3305
			WT	71.4793
			WT	66.4059
			WT	60.6067
			WT	61.2265
			WT	59.946
			WT	59.6576
			WT	55.8981
			WT	53.501
			WT	49.4755
			WT	51.0556
			WT	56.8827
			WT	56.8064
			WT	54.4018
			WT	59.5087
			WT	56.2108
			WT	56.9441
			WT	64.3699
			WT	62.1235
			WT	56.5011
			WT	66.1658
			WT	56.5067
			WT	62.6297
			WT	51.5283
			WT	72.0823
			WT	62.3655
			WT	66.7446
			WT	68.9705
			WT	61.327
			WT	58.5744
			WT	58.9876
			WT	48.0908
			WT	55.4087
			WT	48.2081
			WT	59.33
			WT	69.9327
			WT	66.3743
			WT	58.8591
			WT	50.5605
			WT	50.0506
			WT	50.0506
			WT	55.9502
			WT	70.7739
			WT	66.0597
			WT	67.0629
			WT	63.9641
			WT	66.9084
			WT	63.6198
			WT	65.2464
			WT	56.6202
			WT	63.7799
			WT	61.4219
			WT	51.4352
			WT	56.4248
			WT	61.7476
			WT	44.9865
			WT	46.3023
			WT	50.8359
			WT	60.6849
			WT	52.0978
			WT	52.2895
			WT	52.9446
			WT	49.7602
			WT	52.7845
			WT	58.0887
			WT	55.6041
			WT	58.5986
			WT	57.2586
			WT	59.6818
			WT	60.3815
			WT	54.694
			WT	57.2381
			WT	52.7324
			WT	58.606
			WT	51.653
			WT	62.3859
			WT	51.9824
			WT	61.3865
			WT	55.9726
			WT	55.2579
			WT	53.8844
			WT	48.4165
			WT	67.3104
			WT	55.0923
			WT	51.3794
			WT	54.4781
			WT	61.1464
			WT	55.3361
			WT	71.1033
			WT	71.3025
			WT	61.608
			WT	57.7202
			WT	55.3119
			WT	50.1157
			WT	56.088
			WT	61.8313
			WT	55.6041
			WT	78.2351
			WT	59.7711
			WT	66.7986
			WT	61.6415
			WT	59.9218
			WT	64.9673
			WT	53.4061
			WT	66.0356
			WT	49.7286
			WT	50.7019
			WT	62.4567
			WT	63.2178
			WT	55.5929
			WT	63.7631
			WT	57.9956
			WT	67.6249
			WT	61.9635
			WT	43.9108
			WT	63.1639
			WT	54.1264
			WT	71.3248
			WT	59.6799
			WT	65.3265
			WT	62.0919
			WT	62.8121
			WT	67.7496
			WT	60.6495
			WT	53.8305
			WT	52.6133
			WT	50.6349
			WT	68.4103
			WT	57.6178
			WT	67.677
			WT	51.9079
			WT	68.5536
			WT	74.9223
			WT	63.4616
			WT	76.145
			WT	64.221
			WT	76.2176
			WT	52.8906
			WT	82.095
			WT	78.3393
			WT	61.5391
			WT	78.7655
			WT	67.3625
			WT	76.0129
			WT	73.8317
			WT	55.1835
			WT	43.399
			WT	70.6939
			WT	72.7895
			WT	47.4394
			WT	69.5028
			WT	62.0807
			WT	75.3634
			WT	66.3985
			WT	61.7532
			WT	83.6211
			WT	74.9577
			WT	83.1428
			WT	84.8699
			WT	77.6786
			WT	64.0256
			WT	56.4621
			WT	69.0859
			WT	66.1491
			WT	56.2759
			WT	70.9098
			WT	48.115
			WT	59.6445
			WT	67.677
			WT	81.6893
			WT	73.988
			WT	70.7237
			WT	53.7076
			WT	51.3961
			WT	76.8765
			WT	52.7752
			WT	52.7827
			WT	65.0473
			WT	79.3592
			WT	52.0122
			WT	56.2313
			WT	59.0899
			WT	55.8069
			WT	65.2185
			WT	87.9388
			WT	47.6144
			WT	43.8419
			WT	61.8406
			WT	73.2603
			WT	70.545
			WT	64.7663
			WT	80.2078
			WT	76.8262
			WT	69.7131
			WT	57.3684
			WT	81.5013
			WT	73.3162
			WT	69.9718
			WT	63.9418
			WT	69.6796
			WT	69.0449
			WT	69.3502
			WT	78.3467
			WT	61.1278
			WT	76.9155
			WT	65.3302
			WT	80.1092
			WT	63.8041
			WT	59.9944
			WT	65.4009
			WT	55.8888
			WT	63.1378
			WT	82.6273
			WT	74.2021
			WT	86.6677
			WT	69.9346
			WT	63.7055
			WT	77.4441
			WT	85.123
			WT	70.8763
			WT	72.0134
			WT	84.1627
			WT	82.3239
			WT	46.2558
			WT	57.3293
			WT	66.0597
			WT	75.0377
			WT	74.9558
			WT	70.4296
			WT	58.7493
			WT	69.7075
			WT	56.9422
			WT	53.9123
			KO	38.8337
			KO	39.6861
			KO	44.7557
			KO	43.1999
			KO	25.7818
			KO	45.4555
			KO	41.5416
			KO	45.7328
			KO	36.0011
			KO	38.2549
			KO	21.3226
			KO	35.5377
			KO	36.2542
			KO	44.0783
			KO	39.7754
			KO	40.2128
			KO	78.9367
			KO	41.7519
			KO	50.4563
			KO	42.0162
			KO	38.3591
			KO	62.639
			KO	45.0088
			KO	37.9218
			KO	35.225
			KO	34.4955
			KO	42.9691
			KO	47.5213
			KO	40.8028
			KO	41.7259
			KO	45.2768
			KO	47.3613
			KO	35.3572
			KO	33.3844
			KO	41.2178
			KO	46.0176
			KO	39.6861
			KO	26.5244
			KO	26.9785
			KO	32.0407
			KO	28.5102
			KO	25.9698
			KO	26.2564
			KO	50.7615
			KO	69.687
			KO	56.704
			KO	49.4159
			KO	55.083
			KO	58.5539
			KO	47.8638
			KO	62.3003
			KO	51.4482
			KO	83.7923
			KO	59.1848
			KO	56.2908
			KO	64.5206
			KO	49.6337
			KO	65.1813
			KO	60.013
			KO	53.6481
			KO	53.2852
			KO	45.3811
			KO	62.3357
			KO	35.078
			KO	53.0581
			KO	45.5262
			KO	75.1214
			KO	65.2669
			KO	54.2827
			KO	37.1234
			KO	38.99
			KO	63.8339
			KO	61.4852
			KO	71.9911
			KO	60.7556
			KO	53.5271
			KO	69.1268
			KO	42.3363
			KO	69.0077
			KO	65.3153
			KO	48.8092
			KO	63.9809
			KO	60.1359
			KO	60.8114
			KO	68.1274
			KO	66.0616
			KO	68.0716
			KO	56.6314
			KO	39.9243
			KO	67.5095
			KO	54.7498
			KO	58.1222
			KO	31.7187
			KO	68.3843
			KO	66.19
			KO	66.7186
			KO	48.0164
			KO	26.4555
			KO	34.998
			KO	66.0002
			KO	72.233
			KO	55.6506
			KO	88.5549
			KO	77.2096
			KO	89.4184
			KO	61.1651
			KO	79.9361
			KO	88.4692
			KO	88.4841
			KO	68.79
			KO	85.0653
			KO	76.8616
			KO	93.1276
			KO	96.2952
			KO	77.9019
			KO	45.3904
			KO	88.8247
			KO	72.7001
			KO	80.245
			KO	78.0024
			KO	87.0474
			KO	84.3395
			KO	94.73
			KO	22.0373
			KO	18.1662
			KO	22.0968
			KO	70.3477
			KO	69.996
			KO	85.6069
			KO	39.6433
			KO	64.1335
			KO	82.2513
			KO	70.2193
			KO	70.9042
			KO	73.1152
			KO	73.078
			KO	71.0438
			KO	72.3875
			KO	70.5859
			KO	76.0334
			KO	66.9289
			KO	76.6475
			KO	61.956
			KO	74.4887
			KO	85.9158
			KO	69.754
			KO	77.5483
			KO	101.819
			KO	86.6714
			KO	74.1909
			KO	83.7476
			KO	72.3949
			KO	79.7072
			KO	78.2276
			KO	74.3565
			KO	72.6741
			KO	70.6995
			KO	71.684
			KO	68.6485
			KO	74.1686
			KO	74.3398
			KO	44.5119
			KO	51.3757
			KO	36.2989
			KO	51.8335
			KO	54.5712
			KO	56.5402
			KO	47.955
			KO	45.8259
			KO	45.757
			KO	57.3014
			KO	45.1075
			KO	52.4774
			KO	53.1102
			KO	49.3173
			KO	49.6467
			KO	48.2211
			KO	49.8142
			KO	56.8119
			KO	48.7608
			KO	55.1872
			KO	60.3983
			KO	51.8074
			KO	49.5704
			KO	46.4661
			KO	60.8729
			KO	54.7331
			KO	56.3076
			KO	49.5053
			KO	62.5367
			KO	48.4016
			KO	50.8881
			KO	57.3014
			KO	56.3299
			KO	52.6003
			KO	50.8471
			KO	59.9833
			KO	49.0512
			KO	47.6367
			KO	42.4926
			KO	42.4926
			KO	54.7052
			KO	49.0753
			KO	50.2311
			KO	48.2062
			KO	47.3743
			KO	56.2499
			KO	44.1862
			KO	47.1342
			KO	45.5914
			KO	52.8031
			KO	53.8919
			KO	52.362
			KO	55.4012
			KO	46.0939
			KO	58.4683
			KO	52.2429
			KO	46.0957
			KO	44.8544
			KO	53.1288
			KO	59.1588
			KO	66.1323
			KO	53.8453
			KO	61.863
			KO	50.8713
			KO	52.0177
			KO	50.6926
			KO	51.6455
			KO	67.3439
			KO	49.8812
			KO	65.7341
			KO	57.4056
			KO	53.635
			KO	49.5034
			KO	55.766
			KO	58.4962
			KO	58.366
			KO	36.2896
			KO	36.1091
			KO	46.2279
			KO	50.4581
			KO	53.8174
			KO	61.8853
			KO	52.9948
			KO	54.7126
			KO	58.3492
			KO	47.0654
			KO	47.0523
			KO	52.3044
			KO	44.9232
			KO	59.129
			KO	55.5389
			KO	42.5596
			KO	46.1329
			KO	51.599
			KO	71.7622
			KO	46.0659
			KO	45.2861
			KO	48.0815
			KO	47.7614
			KO	37.879
			KO	54.3255
			KO	49.1237
			KO	45.5876
			KO	47.2012
			KO	40.8865
			KO	47.9364
			KO	48.8408
			KO	51.8577
			KO	40.8418
			KO	54.5414
			KO	52.4328
			KO	48.9469
			KO	40.7339
			KO	49.3061
			KO	50.5828
			KO	52.3918
			KO	46.3004
			KO	38.7072
			KO	44.1416
			KO	47.2124
			KO	42.3289
			KO	45.1298
			KO	48.1913
			KO	45.061
			KO	48.6305
			KO	45.2657
			KO	49.1368
			KO	45.9133
			KO	45.891
			KO	49.5536
			KO	35.0203
			KO	46.0976
			KO	51.1523
			KO	51.5208
			KO	49.6244
			KO	51.331
			KO	49.4178
			KO	46.3879
			KO	47.1082
			KO	49.8198
			KO	51.1765
			KO	48.4835
			KO	47.0319
			KO	51.4836
			KO	53.9905
			KO	49.1368
			KO	47.9773
			KO	56.959
			KO	44.3072
			KO	57.4503
			KO	45.6546
			KO	46.4996
			KO	53.3503
			KO	56.5923
			KO	64.5709
			KO	56.2648
			KO	51.5897
			KO	47.8917
			KO	40.049
			KO	48.0945
			KO	51.6455
			KO	47.0319
			KO	42.1539
			KO	38.8821
			KO	52.9092
			KO	53.0748
			KO	47.6386
			KO	53.4154
			KO	52.6822
			KO	38.8802
			KO	39.8015
			KO	49.7156
			KO	50.7578
			KO	50.8918
			KO	50.3558
			KO	45.9989
			KO	52.2746
			KO	53.7262
			KO	43.412
			KO	44.27
			KO	46.2037
			KO	44.2625
			KO	48.0387
			KO	51.5655
			KO	49.8589
			KO	55.5408
			KO	44.4635
			KO	62.747
			KO	60.6104
			KO	48.2509
			KO	54.8876
			KO	57.0427
			KO	51.0481
			KO	63.5268
			KO	52.8515
			KO	57.8244
			KO	55.4533
			KO	52.1443
			KO	57.0985
			KO	51.3515
			KO	48.8688
			KO	54.4818
			KO	43.3301
			KO	50.2162
			KO	47.1566
			KO	45.7775
			KO	47.8303
			KO	53.7542
			KO	37.8771
			KO	51.3366
			KO	59.1458
			KO	46.9909
			KO	54.9173
			KO	63.8897
			KO	44.4542
			KO	43.9052
			KO	76.346
			KO	42.6881
			KO	39.8127
			KO	47.5976
			KO	44.8767
			KO	47.0654
			KO	66.646
			KO	56.8231
			KO	50.9755
			KO	55.0551
			KO	55.1388
			KO	52.1201
			KO	38.6718
			KO	48.6901
			KO	22.4691
			KO	54.6196
			KO	54.1673
			KO	42.1632
			KO	58.0533
			KO	33.3249
			KO	25.0765
			KO	50.7838
			KO	54.9583
			KO	56.4844
			KO	41.7575
			KO	53.2814
			KO	54.4223
			KO	34.3615
			KO	42.0218
			KO	45.4257
			KO	55.2393
			KO	57.6532
			KO	47.2608
			KO	50.8713
			KO	54.4614
			KO	56.1699
			KO	49.0418
			KO	50.3911
			KO	67.4072
			KO	40.5645
			KO	45.9375
			KO	47.7112
			KO	51.2212
			KO	55.7939
			KO	36.6748
			KO	30.7119
			KO	44.4282
			KO	49.0232
			KO	48.9786
			KO	47.8079
			KO	33.578
			KO	46.6057
			KO	49.1498
			KO	46.7639
			KO	51.9768
			KO	39.3827
			KO	43.8382
			KO	39.4907
			KO	48.7366
			KO	51.6921
			KO	66.8135
			KO	67.2155
			KO	52.5277
			KO	45.5225
			KO	44.2812
			KO	30.2838
			KO	47.7484
			KO	55.2021
			KO	34.7933
			KO	51.3124
			KO	38.5062
			KO	46.9891
			KO	53.8547
			KO	28.7689
			KO	42.6341
			KO	50.1846
			KO	46.0231
			KO	31.9942
			KO	39.4423
			KO	48.5635
			KO	50.1008
			KO	55.2319
			KO	48.5896
			KO	43.0119
			KO	68.6709
			KO	67.2099
			KO	77.1519
			KO	64.0833
			KO	51.4687
			KO	20.6396
			KO	50.4693
			KO	56.3448
			KO	47.8377
			KO	46.6019
			KO	53.6239
			KO	49.9408
			KO	62.5832
			KO	55.109
			KO	54.3311
			KO	47.2403
			KO	43.2259
			KO	59.732
			KO	54.2157
			KO	57.361
			KO	40.384
			KO	54.9378
			KO	46.7583
			KO	39.178
			KO	27.2037
			KO	26.7403
			KO	46.4959
			KO	37.4323
			KO	46.414
			KO	50.4916
			KO	44.7111
			KO	55.3714
			KO	54.7536
			KO	37.9888
			KO	54.3776
			KO	55.5278
			KO	50.5177
			KO	60.3815
			KO	66.7539
			KO	49.1628
			KO	33.4384
			KO	29.4835
			KO	38.6532
			KO	41.9138
			KO	36.1109
			KO	27.4605
			KO	38.5732
			KO	24.0342
			KO	36.0718
			KO	36.7791
			KO	43.2855
			KO	41.6719
			KO	53.8267
			KO	45.2303
			KO	53.5997
			KO	38.9677
			KO	47.2719
			KO	44.1081
			KO	39.2711
			KO	47.0263
			KO	45.1298
			KO	30.5481
			KO	40.1979
			KO	38.4931
			KO	37.7096
			KO	44.1751
			KO	50.4842
			KO	53.3931
			KO	37.4379
			KO	38.5769
			KO	40.4473
			KO	44.203
			KO	31.3781
			KO	44.2588
			KO	50.1939
			KO	44.994
			KO	43.6167
			KO	43.0659
